# Supplementary material
Source: ML conference proceedings conference paper supplement (https://proceedings.mlr.press/v156/saillard21a.html)
Supplement: Supplementary file [file saillard21a-supp.pdf]

## Supplementary Tables and Figures

|          | Split      | TCGA-CRC     |                          | TCGA-GASTRIC |                          |
|----------|------------|--------------|--------------------------|--------------|--------------------------|
|          |            | ImageNet     | MoCo-CRC                 | ImageNet     | MoCo-Gastric             |
| MeanPool | CV         | 0.84 (0.05)  | 0.87 (0.05) <b>+0.03</b> | 0.76 (0.04)  | 0.82 (0.05) <b>+0.06</b> |
| MeanPool | CV centers | 0.78 (0.10)  | 0.85 (0.07) <b>+0.07</b> | 0.72 (0.12)  | 0.85 (0.07) <b>+0.13</b> |
| DeepMIL  | CV         | 0.82 (0.05)  | 0.88 (0.05) <b>+0.06</b> | 0.74 (0.01)  | 0.85 (0.05) <b>+0.11</b> |
| DeepMIL  | CV centers | 0.79 (0.059) | 0.84 (0.11) <b>+0.05</b> | 0.73 (0.15)  | 0.85 (0.05) <b>+0.12</b> |
| Chowder  | CV         | 0.81 (0.05)  | 0.88 (0.04) <b>+0.07</b> | 0.73 (0.07)  | 0.84 (0.06) <b>+0.11</b> |
| Chowder  | CV centers | 0.75 (0.15)  | 0.83 (0.12) <b>+0.08</b> | 0.72 (0.08)  | 0.86 (0.05) <b>+0.14</b> |

Table S1: Cross-validation performances (AUC) on TCGA-CRC and TCGA-Gastric. We report mean and standard deviation on  $3 \times 5$  folds. We split the data into 5 fold either randomly (CV) or by ensuring that all samples from a center are in the same set (CV centers).

| Feature extractor | Train dataset | MeanPool  | Chowder                 | DeepMIL                |
|-------------------|---------------|-----------|-------------------------|------------------------|
| ImageNet          | CRC           | $C = 1$   | $R = 100$<br>100 epochs | $N = 64$<br>30 epochs  |
| ImageNet          | Gastric       | $C = 0.0$ | $R = 25$<br>30 epochs   | $N = 64$<br>20 epochs  |
| MoCo-CRC          | CRC           | $C = 0.5$ | $R = 10$<br>10 epochs   | $N = 32$<br>10 epochs  |
| MoCo-Gastric      | Gastric       | $C = 1.0$ | $R = 100$<br>30 epochs  | $N = 128$<br>10 epochs |
| MoCo-CRC-Gastric  | CRC           | $C = 0.5$ | $R = 100$<br>30 epochs  | $N = 64$<br>10 epochs  |

Table S2: Hyperparameters used for the different models. All hyperparameters were tuned on the training sets of the TCGA-CRC-Kather or TCGA-Gastric-Kather cohorts.  $C$  refers to L2 penalization coefficient,  $R$  to the number of extreme tiles used in Chowder and  $N$  to the size of the attention layer in DeepMIL.

| Methods  | MoCo-CRC-Gastric |
|----------|------------------|
| MeanPool | 0.86 (0.04)      |
| Chowder  | 0.88 (0.05)      |
| DeepMIL  | 0.88 (0.06)      |

Table S3: Cross-validation performances (AUC) on TCGA-CRC, for the models trained using the features of MoCo-CRC-Gastric. The result reported are the mean and the standard deviation from 5-fold cross-validation repeated 3 times.

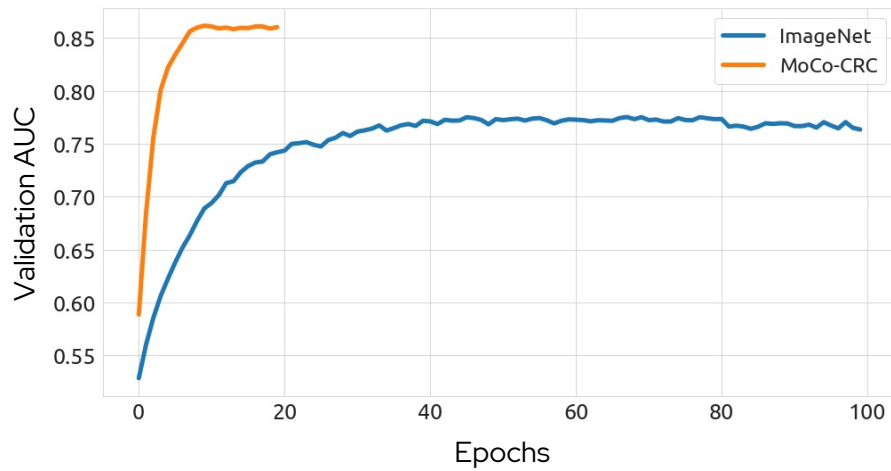

Figure S1: Validation Curves of Chowder with ImageNet and MoCo-CRC features. The plot represents the average validation AUCs per epoch of all runs of the cross-validation for Chowder trained with ImageNet and MoCo-CRC features, depicted in Table 3.
